# Supplementary material
Source: MDPI journal article supplement (https://www.mdpi.com/2075-5309/8/2/22)
Supplement: s1 [file s1]

| Authors                                                                         | Title                                                                                                                                                | Year | Source                                                              |
|---------------------------------------------------------------------------------|------------------------------------------------------------------------------------------------------------------------------------------------------|------|---------------------------------------------------------------------|
| Godts S., Hayen R., De Clercq H.                                                | Investigating salt decay of stone materials related to the environment, a case study in the St. James church in Liège, Belgium                       | 2017 | Studies in Conservation                                             |
| Rizzi J., Torresan S., Zabeo A., Critto A., Tosoni A., Tomasin A., Marcomini A. | Assessing storm surge risk under future sea-level rise scenarios: a case study in the North Adriatic coast                                           | 2017 | Journal of Coastal Conservation                                     |
| Pavlíková M., Zemanová L., Pavlík Z.                                            | Thermophysical properties of hydrophobised lime plasters - The influence of ageing                                                                   | 2017 | AIP Conference Proceedings                                          |
| Radziszewska-Zielina E., Śladowski G.                                           | <i>Supporting the selection of a variant of the adaptation of a historical building with the use of fuzzy modelling and structural analysis</i>      | 2017 | <i>Journal of Cultural Heritage</i>                                 |
| Prieto A.J., Silva A., de Brito J., Macías-Bernal J.M., Alejandro F.J.          | <i>The Influence of Pathological Situations on Churches' Functionality: An Approach Based on Historical Records</i>                                  | 2017 | <i>International Journal of Architectural Heritage</i>              |
| Fagone M., Loccarini F., Ranocchiai G.                                          | Strength evaluation of jute fabric for the reinforcement of rammed earth structures                                                                  | 2017 | Composites Part B: Engineering                                      |
| Genova E., Fatta G., Vinci C.                                                   | <i>The Recurrent Characteristics of Historic Buildings as a Support to Improve their Energy Performances: The Case Study of Palermo</i>              | 2017 | <i>Energy Procedia</i>                                              |
| González A.G., Zotano M.Á.G., Swan W., Bouillard P., Elkadi H.                  | <i>Maturity Matrix Assessment: Evaluation of Energy Efficiency Strategies in Brussels Historic Residential Stock</i>                                 | 2017 | <i>Energy Procedia</i>                                              |
| Kass K., Blumberga A., Blumberga D., Zogla G., Kamenders A., Kamendere E.       | <i>Pre-assessment Method for Historic Building Stock Renovation Evaluation</i>                                                                       | 2017 | <i>Energy Procedia</i>                                              |
| Di Ruocco G., Sicignano C., Sessa A.                                            | <i>Integrated Methodologies Energy Efficiency of Historic Buildings</i>                                                                              | 2017 | <i>Procedia Engineering</i>                                         |
| Hong Y., Chen F.                                                                | Evaluating the adaptive reuse potential of buildings in conservation areas                                                                           | 2017 | Facilities                                                          |
| Achmad A.                                                                       | The influence of green open spaces and historical areas on urban growth of Banda Aceh, Indonesia: A case study using the sim-weight method           | 2017 | International Journal of Ecology and Development                    |
| Jamhawi M.M., Hajahjah Z.A.                                                     | A bottom-up approach for cultural tourism management in the old city of As-Salt, Jordan                                                              | 2017 | Journal of Cultural Heritage Management and Sustainable Development |
| Ginks N., Painter B.                                                            | Energy retrofit interventions in historic buildings: Exploring guidance and attitudes of conservation professionals to slim double glazing in the UK | 2017 | Energy and Buildings                                                |
| Cirami S., Evola G., Gagliano A., Margani G.                                    | Thermal and Economic Analysis of Renovation Strategies for a Historic Building in Mediterranean Area                                                 | 2017 | Buildings                                                           |
| Lenticchia E., Coisson E.                                                       | The use of GIS for the application of the phenomenological approach to the seismic risk                                                              | 2017 | International Archives of the Photogrammetry,                       |

| Authors                                                                                           | Title                                                                                                                                                                        | Year | Source                                                                                                         |
|---------------------------------------------------------------------------------------------------|------------------------------------------------------------------------------------------------------------------------------------------------------------------------------|------|----------------------------------------------------------------------------------------------------------------|
|                                                                                                   | analysis: The case of the Italian fortified architecture                                                                                                                     |      | Remote Sensing and Spatial Information Sciences - ISPRS Archives                                               |
| Angelini M.G., Baiocchi V., Costantino D., Garzia F.                                              | Scan to BIM for 3D reconstruction of the papal basilica of saint Francis in Assisi In Italy                                                                                  | 2017 | International Archives of the Photogrammetry, Remote Sensing and Spatial Information Sciences - ISPRS Archives |
| Radicioni F., Matracchi P., Brigante R., Brozzi A., Cecconi M., Stoppini A., Tosi G.              | The Tempio della Consolazione in Todi: Integrated geomatic techniques for a monument description including structural damage evolution in time                               | 2017 | International Archives of the Photogrammetry, Remote Sensing and Spatial Information Sciences - ISPRS Archives |
| Oreni D., Brumana R., Torre S.D., Banfi F.                                                        | Survey, HBIM and conservation plan of a monumental building damaged by earthquake                                                                                            | 2017 | International Archives of the Photogrammetry, Remote Sensing and Spatial Information Sciences - ISPRS Archives |
| Nastasi B., Di Matteo U.                                                                          | Innovative Use of Hydrogen in Energy Retrofitting of Listed Buildings                                                                                                        | 2017 | Energy Procedia                                                                                                |
| Meloni D., De Nicolo B.                                                                           | Non linear FEM modelling for the design of openings in masonry walls                                                                                                         | 2017 | Key Engineering Materials                                                                                      |
| Zanotti Fragonara L., Boscato G., Ceravolo R., Russo S., Ientile S., Pecorelli M.L., Quattrone A. | Dynamic investigation on the Mirandola bell tower in post-earthquake scenarios                                                                                               | 2017 | Bulletin of Earthquake Engineering                                                                             |
| Oppio A., Bottero M., Ferretti V.                                                                 | Designing adaptive reuse strategies for cultural heritage with choice experiments                                                                                            | 2017 | Green Energy and Technology                                                                                    |
| Magrini A., Franco G.                                                                             | The energy performance improvement of historic buildings and their environmental sustainability assessment                                                                   | 2016 | Journal of Cultural Heritage                                                                                   |
| Tolou Del M.S.T.                                                                                  | Quick seismically diagnosis of Iranian historic brick buildings, the essential sustainability study; by focused on the Sadossaltaneh historic buildings collection of Qazvin | 2016 | IIOAB Journal                                                                                                  |
| Martínez-Molina A., Tort-Ausina I., Cho S., Vivancos J.-L.                                        | Energy efficiency and thermal comfort in historic buildings: A review                                                                                                        | 2016 | Renewable and Sustainable Energy Reviews                                                                       |
| Sadrykia S., Medghalchi L., Mahdavinejad M. *                                                     | Sustainability assessment, rating systems and historical buildings Case study: Rehabilitated construction in a university site                                               | 2016 | MATEC Web of Conferences                                                                                       |
| Kayan B.A., Forster A.M., Banfill P.F.G.                                                          | Green Maintenance for historic masonry buildings: an option appraisal approach                                                                                               | 2016 | Smart and Sustainable Built Environment                                                                        |

| Authors                                                                                       | Title                                                                                                                                                        | Year | Source                                                                                           |
|-----------------------------------------------------------------------------------------------|--------------------------------------------------------------------------------------------------------------------------------------------------------------|------|--------------------------------------------------------------------------------------------------|
| Sesana M.M., Grecchi M.,<br>Salvalai G., Rasica C.                                            | <i>Methodology of energy efficient building refurbishment: Application on two university campus-building case studies in Italy with engineering students</i> | 2016 | <i>Journal of Building Engineering</i>                                                           |
| Murgul V.                                                                                     | <i>Methodology to Improve Energy Efficiency of Residential Historic Buildings in St. Petersburg</i>                                                          | 2016 | <i>MATEC Web of Conferences</i>                                                                  |
| Silva H.E., Henriques<br>F.M.A.                                                               | <i>Hygrothermal analysis of historic buildings: Statistical methodologies and their applicability in temperate climates</i>                                  | 2016 | <i>Structural Survey</i>                                                                         |
| Wang F.                                                                                       | Beijing urban memory: Historic buildings and historic areas, central axes and City Walls                                                                     | 2016 | Beijing Urban Memory: Historic Buildings and Historic Areas, Central Axes and City Walls         |
| Pozas B.M., Espada M.J.                                                                       | <i>Getting Results in an Historical Dwelling Stock in a Thermal Simulation with EnergyPlus</i>                                                               | 2016 | <i>Procedia Engineering</i>                                                                      |
| Berg F., Genova E.,<br>Rroström T.                                                            | <i>Interdisciplinary building categorization - A method to support sustainable energy efficiency strategies in historic districts</i>                        | 2016 | CESB 2016 - Central Europe Towards Sustainable Building 2016: Innovations for Sustainable Future |
| Fatiguso F., Cantatore E.,<br>De Fino M.                                                      | <i>Strategies for energy retrofitting of historic urban districts</i>                                                                                        | 2016 | <i>Progress in Industrial Ecology</i>                                                            |
| Pazderka J., Hájková E.                                                                       | Ventilated underground tunnel as a contribution for sustainable refurbishment of buildings affected by rising moisture                                       | 2016 | CESB 2016 - Central Europe Towards Sustainable Building 2016: Innovations for Sustainable Future |
| van Krugten L.T.F.,<br>Hermans L.M.C., Havinga<br>L.C., Pereira Roders A.R.,<br>Schellen H.L. | Raising the energy performance of historical dwellings                                                                                                       | 2016 | Management of Environmental Quality                                                              |
| Prizeman O.                                                                                   | Maintenance of shared spaces: courtyards of Tbilisi                                                                                                          | 2016 | Journal of Cultural Heritage Management and Sustainable Development                              |
| Kishali E., Bayraktar N.T.,<br>Yardimci S., Demiray M.                                        | Conservation Of 16th century historical Mosques in Kocaeli: Sustainability and assessment of building envelope                                               | 2016 | CESB 2016 - Central Europe Towards Sustainable Building 2016: Innovations for Sustainable Future |
| Carbonara E., Tiberi M.                                                                       | Local Energy Efficiency Interventions by the Prioritization of Thermal Zones in an Historical University Building                                            | 2016 | Energy Procedia                                                                                  |
| Bernardini G., Azzolini<br>M., D'Orazio M.,<br>Quagliarini E.                                 | Intelligent evacuation guidance systems for improving fire safety of Italian-style historical theatres without altering their architectural characteristics  | 2016 | Journal of Cultural Heritage                                                                     |
| Muñoz-González C.M.,<br>León-Rodríguez A.L.,<br>Navarro-Casas J.                              | Air conditioning and passive environmental techniques in historic churches in Mediterranean climate. A proposed method to assess damage                      | 2016 | Energy and Buildings                                                                             |

| Authors                                                                          | Title                                                                                                                                                  | Year | Source                                                                                                                                                                      |
|----------------------------------------------------------------------------------|--------------------------------------------------------------------------------------------------------------------------------------------------------|------|-----------------------------------------------------------------------------------------------------------------------------------------------------------------------------|
|                                                                                  | risk and thermal comfort pre-intervention, simulation-based                                                                                            |      |                                                                                                                                                                             |
| De Clercq H., Godts S.                                                           | Rehabilitation of farmhouses and barns: limits of salt content                                                                                         | 2016 | Applied Physics A: Materials Science and Processing                                                                                                                         |
| Semprini G., Marinosci C., Ferrante A., Predari G., Mochi G., Garai M., Gulli R. | Energy management in public institutional and educational buildings: The case of the school of engineering and architecture in Bologna                 | 2016 | Energy and Buildings                                                                                                                                                        |
| Ornelas C., Guedes J.M., Breda-Vázquez I.                                        | <i>Cultural built heritage and intervention criteria: A systematic analysis of building codes and legislation of Southern European countries</i>       | 2016 | <i>Journal of Cultural Heritage</i>                                                                                                                                         |
| Modena C., Lorenzoni F., Caldon M., da Porto F.                                  | Structural health monitoring: a tool for managing risks in sub-standard conditions                                                                     | 2016 | Journal of Civil Structural Health Monitoring                                                                                                                               |
| D'Orazio M., Bernardini G., Tacconi S., Arteconi V., Quagliarini E.              | Fire safety in Italian-style historical theatres: How photoluminescent wayfinding can improve occupants' evacuation with no architecture modifications | 2016 | Journal of Cultural Heritage                                                                                                                                                |
| Munarim U., Ghisi E.                                                             | Environmental feasibility of heritage buildings rehabilitation                                                                                         | 2016 | Renewable and Sustainable Energy Reviews                                                                                                                                    |
| De Fino M., Sciotti A., Rubino R., Fatiguso F.                                   | Assessment of historic buildings by radar techniques                                                                                                   | 2016 | Structural Survey                                                                                                                                                           |
| García-Fuentes M.A., Hernández J.L., Meiss A., Colla C.                          | <i>Comprehensive energy diagnosis methodology integrating non destructive testing</i>                                                                  | 2016 | <i>Emerging Technologies in Non-Destructive Testing VI - Proceedings of the 6th International Conference on Emerging Technologies in Nondestructive Testing, ETNDT 2016</i> |
| Chatzigrigoriou P.                                                               | <i>Can we use GIS as a historic city's heritage management system? the case study of Hermoupolis-Syros</i>                                             | 2016 | <i>Proceedings of SPIE - The International Society for Optical Engineering</i>                                                                                              |
| Pretelli M., Fabbri K.                                                           | New Concept of Historical Indoor Microclimate - Learning from the Past for a More Sustainable Future                                                   | 2016 | Procedia Engineering                                                                                                                                                        |
| Dişli G., Özcan Z.                                                               | An evaluation of heating technology in Anatolian Seljuk period hospitals (Darüşşifa)                                                                   | 2016 | Metu Journal of the Faculty of Architecture                                                                                                                                 |
| Llorens J., Zanelli A.                                                           | Structural Membranes for Refurbishment of the Architectural Heritage                                                                                   | 2016 | Procedia Engineering                                                                                                                                                        |
| Andreescu I., Gaivoronsch V., Mosoarca M.                                        | Old and New - The Complex Problem of Integrating New Functions into Old Building                                                                       | 2016 | Procedia Engineering                                                                                                                                                        |
| Ramos L.F., Núñez García A.C., Fernandes F.M., Lourenço P.B.                     | Evaluation of structural intervention in the Quartel das Esquadras, Almeida (Portugal)                                                                 | 2016 | Structural Analysis of Historical Constructions: Anamnesis, diagnosis, therapy, controls - Proceedings of the 10th                                                          |

| Authors                                                                                                                                                                                                                | Title                                                                                                                                          | Year | Source                                                                                                                                                                                          |
|------------------------------------------------------------------------------------------------------------------------------------------------------------------------------------------------------------------------|------------------------------------------------------------------------------------------------------------------------------------------------|------|-------------------------------------------------------------------------------------------------------------------------------------------------------------------------------------------------|
|                                                                                                                                                                                                                        |                                                                                                                                                |      | International Conference on Structural Analysis of Historical Constructions, SAHC 2016                                                                                                          |
| Borgarino M.P., Torre S.D., Gasparoli P., Ronchi A.T.                                                                                                                                                                  | Crespi d'Adda, Italy: The management plan as an opportunity to deal with change                                                                | 2016 | Historic Environment: Policy and Practice                                                                                                                                                       |
| Lorenzoni F., Caldon M., Modena C., Valluzzi M.R.                                                                                                                                                                      | Structural assessment of historical buildings by monitoring and numerical methods: The case of Castelvecchio (Verona)                          | 2016 | Insights and Innovations in Structural Engineering, Mechanics and Computation - Proceedings of the 6th International Conference on Structural Engineering, Mechanics and Computation, SEMC 2016 |
| Dalla Mora T., Cappelletti F., Peron F., Romagnoni P., Bauman F.                                                                                                                                                       | Retrofit of an historical building toward NZEB                                                                                                 | 2015 | Energy Procedia                                                                                                                                                                                 |
| Franco G., Magrini A., Cartesegna M., Guerrini M.                                                                                                                                                                      | Towards a systematic approach for energy refurbishment of historical buildings. the case study of Albergo dei Poveri in Genoa, Italy           | 2015 | Energy and Buildings                                                                                                                                                                            |
| Karakul O.                                                                                                                                                                                                             | <i>An integrated methodology for the conservation of traditional craftsmanship in historic buildings</i>                                       | 2015 | <i>International Journal of Intangible Heritage</i>                                                                                                                                             |
| Kayan B.A.                                                                                                                                                                                                             | Conservation plan and "green maintenance" from sustainable repair perspectives                                                                 | 2015 | Smart and Sustainable Built Environment                                                                                                                                                         |
| Zhang Y., Zhang Y., Shen Z., Nishino T., Chen X.                                                                                                                                                                       | 3D laser scanning technology-based historic building mapping for historic preservation: A case study of Shang Shu Di in Fujian Province, China | 2015 | International Review for Spatial Planning and Sustainable Development                                                                                                                           |
| Burattini C., Nardecchia F., Bisegna F., Cellucci L., Gugliermetti F., De Lieto Vollaro A., Salata F., Golasi I.                                                                                                       | Methodological approach to the energy analysis of unconstrained historical buildings                                                           | 2015 | Sustainability (Switzerland)                                                                                                                                                                    |
| Nesticò A., Macchiaroli M., Pipolo O.                                                                                                                                                                                  | Costs and benefits in the recovery of historic buildings: The application of an economic model                                                 | 2015 | Sustainability (Switzerland)                                                                                                                                                                    |
| Leissner J., Kilian R., Kotova L., Jacob D., Mikolajewicz U., Broström T., Ashley-Smith J., Schellen H.L., Martens M., Van Schijndel J., Antretter F., Winkler M., Bertolin C., Camuffo D., Simeunovic G., Vyhlídal T. | <i>Climate for culture: Assessing the impact of climate change on the future indoor climate in historic buildings using simulations</i>        | 2015 | <i>Heritage Science</i>                                                                                                                                                                         |

| Authors                                              | Title                                                                                                                              | Year | Source                                                                                                                                                              |
|------------------------------------------------------|------------------------------------------------------------------------------------------------------------------------------------|------|---------------------------------------------------------------------------------------------------------------------------------------------------------------------|
| Wei L.                                               | Research on the localization method of protecting traditional village landscape: A case study on Tangyin                           | 2015 | International Archives of the Photogrammetry, Remote Sensing and Spatial Information Sciences - ISPRS Archives                                                      |
| Astiaso Garcia D., Di Matteo U., Cumo F.             | Selecting eco-friendly thermal systems for the "Vittoriale Degli Italiani" historic museum building                                | 2015 | Sustainability (Switzerland)                                                                                                                                        |
| Pisello A.L., Castaldo V.L., Pignatta G., Cotana F.  | <i>Integrated numerical and experimental methodology for thermal-energy analysis and optimization of heritage museum buildings</i> | 2015 | <i>Building Services Engineering Research and Technology</i>                                                                                                        |
| Tonna S., Chesi C., Marino L.                        | The transhumance architecture: Handing down seismic knowledge while migrating                                                      | 2015 | Vernacular Architecture: Towards a Sustainable Future - Proceedings of the International Conference on Vernacular Heritage, Sustainability and Earthen Architecture |
| Mazzolani F.M.                                       | Protection of historical buildings according to Prohitech                                                                          | 2015 | Computational Methods in Applied Sciences                                                                                                                           |
| Teslík J., Vodičková M., Kubečková M.                | Re-use of wooden beams in the new wooden house made of natural materials                                                           | 2015 | International Multidisciplinary Scientific GeoConference Surveying Geology and Mining Ecology Management, SGEM                                                      |
| Dvornik Perhavec D., Rebolj D., Šuman N.             | <i>Systematic approach for sustainable conservation</i>                                                                            | 2015 | <i>Journal of Cultural Heritage</i>                                                                                                                                 |
| Bigerna S., Polinori P.                              | Willingness to pay and public acceptance for hydrogen buses: A case study of Perugia                                               | 2015 | Sustainability (Switzerland)                                                                                                                                        |
| Bađurová S., Jošt J.                                 | Natural materials used for the reconstruction of historical building                                                               | 2015 | International Multidisciplinary Scientific GeoConference Surveying Geology and Mining Ecology Management, SGEM                                                      |
| Lombardi M., Pratali Maffei S., Rosato P., Ifko S. * | A new approach to build heritage sustainable preservation projects: The case study of Vipolže castle – Goriška Brda, Slovenia      | 2015 | Annales - Analiza Istrske in Mediteranske Studije - Series Historia et Sociologia                                                                                   |
| Burland J.B., Jamiolkowski M.B., Viggiani C.         | Underexcavating the tower of Pisa: Back to future                                                                                  | 2015 | Geotechnical Engineering                                                                                                                                            |

| Authors                                                                                                                | Title                                                                                                                | Year | Source                                                                                                                                                               |
|------------------------------------------------------------------------------------------------------------------------|----------------------------------------------------------------------------------------------------------------------|------|----------------------------------------------------------------------------------------------------------------------------------------------------------------------|
| Litti G., Khoshdel S., Audenaert A., Braet J.                                                                          | Hygrothermal performance evaluation of traditional brick masonry in historic buildings                               | 2015 | Energy and Buildings                                                                                                                                                 |
| Rosa Tilocca A., Ferracuti B., Mazzotti C., Bovo M.                                                                    | Seismic vulnerability assessment of a historical masonry building: Pandone Castle                                    | 2015 | 2015 IEEE Workshop on Environmental, Energy, and Structural Monitoring Systems, EESMS 2015 - Proceedings                                                             |
| Aguilar R., Marques R., Sovero K., Martel C., Trujillano F., Boroschek R.                                              | Investigations on the structural behaviour of archaeological heritage in Peru: From survey to seismic assessment     | 2015 | Engineering Structures                                                                                                                                               |
| Guizzardi M., Derome D., Vonbank R., Carmeliet J.                                                                      | Hygrothermal behavior of a massive wall with interior insulation during wetting                                      | 2015 | Building and Environment                                                                                                                                             |
| Filippi M.                                                                                                             | <i>Remarks on the green retrofitting of historic buildings in Italy</i>                                              | 2015 | Energy and Buildings                                                                                                                                                 |
| Bellia L., D'Ambrosio Alfano F.R., Giordano J., Ianniello E., Riccio G.                                                | Energy requalification of a historical building: A case study                                                        | 2015 | Energy and Buildings                                                                                                                                                 |
| Milone D., Peri G., Pitruzzella S., Rizzo G.                                                                           | Are the Best Available Technologies the only viable for energy interventions in historical buildings?                | 2015 | Energy and Buildings                                                                                                                                                 |
| Hume I., Miller J.                                                                                                     | Conservation compendium conservation compendium. Part 7: Imposed load in historic buildings: Assessing what is real  | 2015 | Structural Engineer                                                                                                                                                  |
| Popa A., Ilies N.M., Farcas V.S., Muresan O.C.                                                                         | Geotechnical problems on Transylvanian historical buildings consolidation                                            | 2015 | Geotechnical Engineering for Infrastructure and Development - Proceedings of the XVI European Conference on Soil Mechanics and Geotechnical Engineering, ECSMGE 2015 |
| Troi A., Bastian Z.                                                                                                    | <i>Energy efficiency solutions for historic buildings: A handbook</i>                                                | 2015 | <i>Energy Efficiency Solutions for Historic Buildings: A Handbook</i>                                                                                                |
| Kioussi A., Skordaki N., Karoglou M., Bakolas A., Moropoulou A.                                                        | <i>Integrated protocol for non-destructive testing investigation of historic buildings</i>                           | 2015 | <i>Sensor Letters</i>                                                                                                                                                |
| Moropoulou A., Apostolopoulou M., Moundoulas P., Karoglou M., Delegou E., Lampropoulos K., Gritsopoulou M., Bakolas A. | <i>The combination of NDTs for the diagnostic study of historical buildings: The case of Kaisariani monastery</i>    | 2015 | COMPdyn 2015 - 5th ECCOMAS Thematic Conference on Computational Methods in Structural Dynamics and Earthquake Engineering                                            |
| Nesticò A., Macchiaroli M., Pipolo O.                                                                                  | Historic buildings and energetic requalification a model for the selection of technologically advanced interventions | 2015 | Lecture Notes in Computer Science (including subseries Lecture Notes in                                                                                              |

| Authors                                                                          | Title                                                                                                                                                       | Year | Source                                                                                                                                                                                                            |
|----------------------------------------------------------------------------------|-------------------------------------------------------------------------------------------------------------------------------------------------------------|------|-------------------------------------------------------------------------------------------------------------------------------------------------------------------------------------------------------------------|
|                                                                                  |                                                                                                                                                             |      | Artificial Intelligence and Lecture Notes in Bioinformatics)                                                                                                                                                      |
| Fatiguso F., De Fino M., Cantatore E.                                            | An energy retrofitting methodology of Mediterranean historical buildings                                                                                    | 2015 | Management of Environmental Quality                                                                                                                                                                               |
| Magrini A., Franco G., Guerrini M.                                               | The Impact of the Energy Performance Improvement of Historic Buildings on the Environmental Sustainability                                                  | 2015 | Energy Procedia                                                                                                                                                                                                   |
| Cacciotti R., Drdácký M., Modena C., Da Porto F.                                 | New integrated knowledge-based approaches to the protection of cultural heritage from earthquake-induced risk                                               | 2015 | Improving the Seismic Performance of Existing Buildings and other Structures 2015 - Proceedings of the 2nd ATC and SEI Conference on Improving the Seismic Performance of Existing Buildings and Other Structures |
| Pereira D., Cooper B.                                                            | A global heritage stone province in association with the UNESCO world heritage city of Salamanca, Spain                                                     | 2015 | Engineering Geology for Society and Territory - Volume 5: Urban Geology, Sustainable Planning and Landscape Exploitation                                                                                          |
| Papadopoulos M.L.                                                                | Study of seismic response of traditional URM houses through analytical simulation - The historical core of the city of Xanthi                               | 2015 | Computational Methods in Applied Sciences                                                                                                                                                                         |
| Rossi M., Cattari S., Lagomarsino S.                                             | Performance-based assessment of the Great Mosque of Algiers                                                                                                 | 2015 | Bulletin of Earthquake Engineering                                                                                                                                                                                |
| Pisello A.L., Petrozzi A., Castaldo V.L., Cotana F.                              | On an innovative integrated technique for energy refurbishment of historical buildings: Thermal-energy, economic and environmental analysis of a case study | 2014 | Applied Energy                                                                                                                                                                                                    |
| Pracchi V.                                                                       | Historic buildings and energy efficiency                                                                                                                    | 2014 | Historic Environment: Policy and Practice                                                                                                                                                                         |
| Koudelka P., Jandejsek I., Doktor T., Kytýř D., Jiroušek O., Zima P., Drdácký M. | Radiographical investigation of fluid penetration processes in natural stones used in historical buildings                                                  | 2014 | Journal of Instrumentation                                                                                                                                                                                        |
| Yung E.H.K., Chan E.H.W., Xu Y.                                                  | Community-initiated adaptive reuse of historic buildings and sustainable development in the inner city of Shanghai                                          | 2014 | Journal of Urban Planning and Development                                                                                                                                                                         |
| Cheng X., Han R., Zhu Z.                                                         | The building decorative material renewal design based on the "3R" principles - taking Pingjiang historical street of Suzhou as an example                   | 2014 | Advanced Materials Research                                                                                                                                                                                       |
| Ferretti V., Bottero M., Mondini G.                                              | Decision making and cultural heritage: An application of the Multi-Attribute Value Theory for the reuse of historical buildings                             | 2014 | Journal of Cultural Heritage                                                                                                                                                                                      |

| Authors                                                     | Title                                                                                                                                                          | Year | Source                                                              |
|-------------------------------------------------------------|----------------------------------------------------------------------------------------------------------------------------------------------------------------|------|---------------------------------------------------------------------|
| Eriksson P., Hermann C., Hrabovszky-Horváth S., Rodwell D.  | EFFESUS methodology for assessing the impacts of energy-related retrofit measures on heritage significance                                                     | 2014 | Historic Environment: Policy and Practice                           |
| De Berardinis P., Rotilio M., Marchionni C., Friedman A.    | Improving the energy-efficiency of historic masonry buildings. A case study: A minor centre in the Abruzzo region, Italy                                       | 2014 | Energy and Buildings                                                |
| Nurme S., Kotval Z., Nutt N., Hiob M., Salmistu S.          | Baroque manorial cores and the landscape                                                                                                                       | 2014 | Journal of Cultural Heritage Management and Sustainable Development |
| Camuffo D., Bertolin C., Bonazzi A., Campana F., Merlo C.   | Past, present and future effects of climate change on a wooden inlay bookcase cabinet: A new methodology inspired by the novel European Standard EN 15757:2010 | 2014 | Journal of Cultural Heritage                                        |
| Atakul N., Thaheem M.J., De Marco A.                        | Risk management for sustainable restoration of immovable cultural heritage, part 1: PRM framework                                                              | 2014 | Journal of Cultural Heritage Management and Sustainable Development |
| Chen S.                                                     | The concept of historic authenticity and its methodology for preservation of Historic Urban areas in Chinese contexts                                          | 2014 | Change Over Time                                                    |
| Jiří S., Petra T.                                           | Modelling interior environment of historical building and determination of critical places for application of nanotextiles protection                          | 2014 | Advanced Materials Research                                         |
| Valluzzi M.R., Modena C., de Felice G.                      | Current practice and open issues in strengthening historical buildings with composites                                                                         | 2014 | Materials and Structures/Materiaux et Constructions                 |
| Albo A., Rosa F., Tiberi M., Vivio B.                       | High-efficiency and low-environmental impact systems on a historical building in Rome: An InWall solution                                                      | 2014 | WIT Transactions on the Built Environment                           |
| Pospíšil M.                                                 | Connection of new steel rods to original wrought iron tongs using a clamp joint during a renovation of Teplá monastery                                         | 2014 | Advanced Materials Research                                         |
| Aderohunmu F., Balsamo D., Paci G., Brunelli D.             | Long term WSN monitoring for energy efficiency in EU cultural heritage buildings                                                                               | 2014 | Lecture Notes in Electrical Engineering                             |
| Cannas L.G.F.                                               | Technological-structural analysis of the preindustrial buildings in support of their recovery                                                                  | 2014 | Construction and Building Research                                  |
| Kóródy A., Vukoszávlyev Z.                                  | Aspects of social sustainability in cases of building rehabilitations in Central Europe                                                                        | 2014 | Epites-Epiteszettudomány                                            |
| Colapietro D., Netti A., Fiore A., Fatiguso F., Marano G.C. | On the definition of seismic recovery interventions in r.c. buildings by non-linear static and incremental dynamic analyses                                    | 2014 | International Journal of Mechanics                                  |
| Liang Y., Zhan Q., Che E., Chen M.                          | Semiautomatic generation of three-view drawing of building using terrestrial laser scanning                                                                    | 2014 | IOP Conference Series: Earth and Environmental Science              |
| Palumbo L.                                                  | Sustainable planning strategies in the pattern of recovery, restoration, and new construction works in historically and environmentally                        | 2013 | International Multidisciplinary Scientific                          |

| Authors                                                                                   | Title                                                                                                                                                                            | Year | Source                                                                                                                                         |
|-------------------------------------------------------------------------------------------|----------------------------------------------------------------------------------------------------------------------------------------------------------------------------------|------|------------------------------------------------------------------------------------------------------------------------------------------------|
|                                                                                           | important contexts by the integration of traditional and modern technologies                                                                                                     |      | GeoConference<br>Surveying Geology<br>and Mining Ecology<br>Management, SGEM                                                                   |
| Hickson B.J.                                                                              | Incentives to retain late 19th century housing and the practicalities of conservation and repair of that stock                                                                   | 2013 | WIT Transactions on the Built Environment                                                                                                      |
| Beeson S.T., Doganer S.                                                                   | Visual assessment of San Antonio Franciscan Mission churches in San Antonio for sustainable cultural heritage tourism                                                            | 2013 | WIT Transactions on the Built Environment                                                                                                      |
| Chang Recavarren G.,<br>Fiori C.M., Schexnayder C.                                        | Rammed earth: Construction lessons from experience                                                                                                                               | 2013 | Practice Periodical on Structural Design and Construction                                                                                      |
| Yin W., Yamamoto H.                                                                       | Standing tree assessment for the maintenance of historic wooden buildings: A case study of a world heritage site in China                                                        | 2013 | IForest                                                                                                                                        |
| Bakowski J.                                                                               | Refurbishment of a historical building-design issues                                                                                                                             | 2013 | CESB 2013 PRAGUE - Central Europe<br>Towards Sustainable Building 2013: Sustainable Building and Refurbishment for Next Generations            |
| Morandotti M., Besana D.,<br>Cinieri V.                                                   | The sustainable management of the historical buildings                                                                                                                           | 2013 | CESB 2013 PRAGUE - Central Europe<br>Towards Sustainable Building 2013: Sustainable Building and Refurbishment for Next Generations            |
| Cocen O.N.,<br>Baniotopoulos C.C.                                                         | Heritage buildings' sustainability assessment framework                                                                                                                          | 2013 | CESB 2013 PRAGUE - Central Europe<br>Towards Sustainable Building 2013: Sustainable Building and Refurbishment for Next Generations            |
| Ludwig M., Herbst G.,<br>Rieke-Zapp D.,<br>Rosenbauer R.,<br>Rutishauser S., Zellweger A. | The advantages of parametric modelling for the reconstruction of historic buildings. The example of the in war destroyed church of St. Catherine (Katharinenkirche) in Nuremberg | 2013 | International Archives of the<br>Photogrammetry,<br>Remote Sensing and<br>Spatial Information<br>Sciences - ISPRS<br>Archives                  |
| Carydis P.G.,<br>Giannopoulos V.S.,<br>Athanasiou E.E., Lebesis N.Th.                     | Seismic protection of monuments and historical buildings by a sustainable reduction system of the seismic input motion                                                           | 2013 | ECCOMAS Thematic Conference -<br>COMPDYN 2013: 4th<br>International<br>Conference on<br>Computational<br>Methods in Structural<br>Dynamics and |

| Authors                                      | Title                                                                                                                                            | Year | Source                                                                                                                                                                                                 |
|----------------------------------------------|--------------------------------------------------------------------------------------------------------------------------------------------------|------|--------------------------------------------------------------------------------------------------------------------------------------------------------------------------------------------------------|
|                                              |                                                                                                                                                  |      | Earthquake Engineering, Proceedings - An IACM Special Interest Conference                                                                                                                              |
| Ulusoy M., Erdogan E., Erdogan H.A., Oral M. | Re-using of the historical buildings in the context of sustainability: An architectural design studio study on old girls teacher training school | 2013 | International Archives of the Photogrammetry, Remote Sensing and Spatial Information Sciences - ISPRS Archives                                                                                         |
| Mazzolani F.M.                               | Earthquake protection of historical buildings according to PROHITECH                                                                             | 2013 | ECCOMAS Thematic Conference - COMPDYN 2013: 4th International Conference on Computational Methods in Structural Dynamics and Earthquake Engineering, Proceedings - An IACM Special Interest Conference |
| Villacampa A., Brebbia C.A.                  | Energy efficiency in heritage friendly buildings: A case study in the New Forest (UK)                                                            | 2013 | WIT Transactions on Ecology and the Environment                                                                                                                                                        |
| Borriello F.                                 | The sustainability of Mediterranean port areas: Environmental management for local regeneration in Valencia                                      | 2013 | Sustainability (Switzerland)                                                                                                                                                                           |
| Liusman E., Ho D.C.W., Ge J.X.               | <i>Indicators for heritage buildings sustainability</i>                                                                                          | 2013 | CESB 2013 PRAGUE - Central Europe Towards Sustainable Building 2013: Sustainable Building and Refurbishment for Next Generations                                                                       |
| Félix D., Feio A., Branco J.M., Machado J.S. | Innovative architectural and structural design to preserve historical centers                                                                    | 2013 | Structures and Architecture: Concepts, Applications and Challenges - Proceedings of the 2nd International Conference on Structures and Architecture, ICSA 2013                                         |
| Bláha J.                                     | Historic traceology as a complex tool for rediscovery of lost construction skills and techniques                                                 | 2013 | WIT Transactions on the Built Environment                                                                                                                                                              |
| Lluís i Ginovart J., Costa A., Fortuny G.    | Assessment and restoration of a masonry dome in the cathedral of Tortosa enclosure                                                               | 2013 | WIT Transactions on the Built Environment                                                                                                                                                              |

| Authors                                                                           | Title                                                                                                                                 | Year | Source                                                                                                                                      |
|-----------------------------------------------------------------------------------|---------------------------------------------------------------------------------------------------------------------------------------|------|---------------------------------------------------------------------------------------------------------------------------------------------|
| Ochoa J.C., Carvajal H.H.                                                         | Heritage architecture from the Colonización Antioqueña: The case of the Santamaría Theater                                            | 2013 | WIT Transactions on the Built Environment                                                                                                   |
| Mattone M.                                                                        | Wooden boards arches roofs in late nineteenth-century industrial architecture: Conservation problems                                  | 2013 | Advanced Materials Research                                                                                                                 |
| Stepinac M., Rajčić V., Čizmar D.                                                 | Learning from case studies: Timber tower of Gospić cathedral and traditional timber church                                            | 2013 | Advanced Materials Research                                                                                                                 |
| do Valle A., Biscaglia Pereira N., Castello Branco Nappi S.                       | Recommendations for design in preserving historical buildings with wooden structures' roofs                                           | 2013 | Advanced Materials Research                                                                                                                 |
| da Silva Bertolini M., de Macedo L.B., de Almeida D.H., Icimoto F.H., Lahr F.A.R. | Restoration of structural timber elements using epoxy resin: Analysis of mechanical properties                                        | 2013 | Advanced Materials Research                                                                                                                 |
| Kuruscu A.O., Arun G.                                                             | Failures of the listed wooden buildings in Istanbul                                                                                   | 2013 | Advanced Materials Research                                                                                                                 |
| Cavalli A., Togni M.                                                              | The influence of routed grooves on the bending behavior of old timber beams                                                           | 2013 | Advanced Materials Research                                                                                                                 |
| Karantoni F.V.                                                                    | Seismic retrofitting of Fragavilla monastery                                                                                          | 2013 | Earthquake and Structures                                                                                                                   |
| Cano M., Garzón E., Sánchez-Soto P.J.                                             | Historic preservation, GIS, & rural development: The case of Almería province, Spain                                                  | 2013 | Applied Geography                                                                                                                           |
| Hlavathy Z.                                                                       | The conservation of the Aita Mare Communal Hall [A nagyajtai községháza felújítása]                                                   | 2013 | Transsylvania Nostra                                                                                                                        |
| Barbosa L.C., Barbosa P.P., Jung N.E., De Angelis B.L.D., De Angelis Neto G.      | Maringá and its historical heritage: A case study on the cathedral of the Assumption                                                  | 2013 | Acta Scientiarum - Technology                                                                                                               |
| Gigliarelli E., Carlea D., Corcella A., Porfyriou H.                              | <i>Historical social housing: Smart analysis and design for conservation and energy regeneration</i>                                  | 2012 | <i>Lecture Notes in Computer Science (including subseries Lecture Notes in Artificial Intelligence and Lecture Notes in Bioinformatics)</i> |
| Erkal A., D'Ayala D., Sequeira L.                                                 | Assessment of wind-driven rain impact, related surface erosion and surface strength reduction of historic building materials          | 2012 | Building and Environment                                                                                                                    |
| Donofrio G.                                                                       | Preservation by adaptation: Is it sustainable?                                                                                        | 2012 | Change Over Time                                                                                                                            |
| Xu Y.                                                                             | Research on the renovation and re-use design of historic buildings                                                                    | 2012 | Applied Mechanics and Materials                                                                                                             |
| Amin S.K., Maarouf N.M., Ali S.S.                                                 | Sustainable development of cultural heritage via anti weathering nanoparticles material                                               | 2012 | Australian Journal of Basic and Applied Sciences                                                                                            |
| Yildirim M.                                                                       | <i>Assessment of the decision-making process for re-use of a historical asset: The example of Diyarbakir Hasan Pasha Khan, Turkey</i> | 2012 | <i>Journal of Cultural Heritage</i>                                                                                                         |

| Authors                                                               | Title                                                                                                                                                                                                                                       | Year | Source                                                                                                                                                          |
|-----------------------------------------------------------------------|---------------------------------------------------------------------------------------------------------------------------------------------------------------------------------------------------------------------------------------------|------|-----------------------------------------------------------------------------------------------------------------------------------------------------------------|
| Yildirim M., Turan G.                                                 | Sustainable development in historic areas: Adaptive re-use challenges in traditional houses in Sanliurfa, Turkey                                                                                                                            | 2012 | Habitat International                                                                                                                                           |
| Aste N., Adhikari R.S., Buzzetti M.                                   | Energy retrofit of historical buildings: An Italian case study                                                                                                                                                                              | 2012 | Journal of Green Building                                                                                                                                       |
| Shendova V., Rakicevic Z.T., Krstevska L., Tashkov L., Gavrilovic P.  | Shaking table testing of models of historic buildings and monuments - IZIIS' experience                                                                                                                                                     | 2012 | Geotechnical, Geological and Earthquake Engineering                                                                                                             |
| Leucci G., Masini N., Persico R.                                      | <i>Timefrequency analysis of GPR data to investigate the damage of monumental buildings</i>                                                                                                                                                 | 2012 | <i>Journal of Geophysics and Engineering</i>                                                                                                                    |
| Gasco G.                                                              | The contribution of the Turkish historical Society to the first stage of the governmental program for the protection of monuments in Edirne (1933-1941): Preservation policies and ideology in the representation of architectural heritage | 2012 | Belleten                                                                                                                                                        |
| Schibuola L., Tambani C.                                              | Renewable energy sources for historic buildings: The crucifers convent in Venice                                                                                                                                                            | 2012 | WIT Transactions on Ecology and the Environment                                                                                                                 |
| Iyer-Raniga U., Wong J.P.C.                                           | Evaluation of whole life cycle assessment for heritage buildings in Australia                                                                                                                                                               | 2012 | Building and Environment                                                                                                                                        |
| Ultav Z.T., Savaşır G.                                                | The erasure of history in the remodelling of the Grand Efes Hotel in Izmir                                                                                                                                                                  | 2012 | Interiors: Design, Architecture, Culture                                                                                                                        |
| Adhikari R.S., Longo E., Pracchi V., Rogora A., Rosina E., Schippa G. | <i>Methodological procedure for energy performance evaluation of historical buildings</i>                                                                                                                                                   | 2011 | <i>PLEA 2011 - Architecture and Sustainable Development, Conference Proceedings of the 27th International Conference on Passive and Low Energy Architecture</i> |
| Francis T.J., Geens A.J., Littlewood J.                               | Assessing the effectiveness of maintenance practice, in caring for historic buildings                                                                                                                                                       | 2011 | Association of Researchers in Construction Management, ARCOM 2011 - Proceedings of the 27th Annual Conference                                                   |
| Makrodimitri M., Campbell J.W.P.                                      | Sustainability and heritage conservation: Assessment of environmental performance and thermal comfort conditions of historic churches                                                                                                       | 2011 | PLEA 2011 - Architecture and Sustainable Development, Conference Proceedings of the 27th International Conference on Passive and Low Energy Architecture        |

| Authors                                                                     | Title                                                                                                                              | Year | Source                                                                                                         |
|-----------------------------------------------------------------------------|------------------------------------------------------------------------------------------------------------------------------------|------|----------------------------------------------------------------------------------------------------------------|
| De Berardinis P., Rotilio M.                                                | Intervention strategies in historical regional architecture: A case study - The internal area of Abruzzo                           | 2011 | WIT Transactions on the Built Environment                                                                      |
| Luna D.                                                                     | Learning from historic wooden structures: Performance through hurricanes, earthquakes and other challenges in the tropics          | 2011 | WIT Transactions on the Built Environment                                                                      |
| Soria F.J., Guerrero L.F., García A.B.                                      | Traditional rammed earth construction: Conservation of built heritage in México                                                    | 2011 | WIT Transactions on the Built Environment                                                                      |
| Ingham J.P.                                                                 | Petrography of geomaterials: A review                                                                                              | 2011 | Quarterly Journal of Engineering Geology and Hydrogeology                                                      |
| <i>Abruzzese D., Greco C., Miccoli L.</i>                                   | <i>Conservation of historical buildings: A sustainable approach in the earth houses of Fujian case study</i>                       | 2011 | <i>International Journal for Housing Science and Its Applications</i>                                          |
| <i>Abdul Rashid R., Ahmad A.G.</i>                                          | <i>Overview of maintenance approaches of historical buildings in Kuala Lumpur - A current practice</i>                             | 2011 | <i>Procedia Engineering</i>                                                                                    |
| <i>Forster A.M., Carter K., Banfill P.F.G., Kayan B.</i>                    | <i>Green maintenance for historic masonry buildings: an emerging concept</i>                                                       | 2011 | <i>Building Research and Information</i>                                                                       |
| Massari G.A., Luce F., Pellegatta C.                                        | Multiscale interactive communication: Inside and outside the Thun castle                                                           | 2011 | International Archives of the Photogrammetry, Remote Sensing and Spatial Information Sciences - ISPRS Archives |
| Garevski M.                                                                 | Fixed and base isolation retrofitting of historic masonry buildings                                                                | 2011 | International Journal of Materials and Structural Integrity                                                    |
| Heinrichs K., Fitzner B.                                                    | Assessment of weathering damage on the Petroglyphs of Cheonjeon-ri, Ulsan, Republic of Korea                                       | 2011 | Environmental Earth Sciences                                                                                   |
| Modena C., Valluzzi M.R., Da Porto F., Casarin F.                           | Structural aspects of the conservation of historic masonry constructions in seismic areas: Remedial measures and emergency actions | 2011 | International Journal of Architectural Heritage                                                                |
| Johar S., Che-Ani A.I., Tawil N.M., Tahir M.M., Abdullah N.A.G., Ahmad A.G. | Key conservation principles of old traditional mosque in Malaysia                                                                  | 2011 | WSEAS Transactions on Environment and Development                                                              |
| Francis T.J., Geens A.J., Littlewood J.                                     | Is facilities management fundamental to the conservation of heritage buildings and their contents?                                 | 2010 | Association of Researchers in Construction Management, ARCOM 2010 - Proceedings of the 26th Annual Conference  |
| <i>Wang H.-J., Zeng Z.-T.</i>                                               | <i>A multi-objective decision-making process for reuse selection of historic buildings</i>                                         | 2010 | <i>Expert Systems with Applications</i>                                                                        |
| Kamaruzzaman S.N., Emma Zawawi M.A., Pitt M., Don Z.M.                      | Occupant feedback on indoor environmental quality in refurbished historic buildings                                                | 2010 | International Journal of Physical Sciences                                                                     |

| Authors                                                                                                         | Title                                                                                                                                              | Year | Source                                                                                                       |
|-----------------------------------------------------------------------------------------------------------------|----------------------------------------------------------------------------------------------------------------------------------------------------|------|--------------------------------------------------------------------------------------------------------------|
| Silva B., Correia J., Nunes F., Tavares P., Varum H., Pinto J.                                                  | Bird nest construction - Lessons for building with earth                                                                                           | 2010 | WSEAS Transactions on Environment and Development                                                            |
| Svobodová M.                                                                                                    | Green landmarks: Possible ways of decreasing the energetic demands of historically valuable buildings                                              | 2010 | Proceedings: CESB 2010 Prague - Central Europe towards Sustainable Building 'From Theory to Practice'        |
| Olivero S., Huovila P., Porkka J., Stirano F.                                                                   | <i>Managing the indoor security and safety in historical buildings</i>                                                                             | 2010 | <i>Proceedings: CESB 2010 Prague - Central Europe towards Sustainable Building 'From Theory to Practice'</i> |
| Zlámál M., Štěpánek P.                                                                                          | Strengthening of masonry vaulted structures (DVD Proceedings)                                                                                      | 2010 | Proceedings: CESB 2010 Prague - Central Europe towards Sustainable Building 'From Theory to Practice'        |
| Nazarzadeh E., Zarei N.                                                                                         | Study about the formation and assessment factors in urban collective memory, and their effects on architectural design                             | 2010 | Design Principles and Practices                                                                              |
| Lagomarsino S., Modaresi H., Pitilakis K., Bosiljkov V., Calderini C., D'ayala D., Benouar D., Cattari S.       | PERPETUATE Project: The proposal of a performance-based approach to earthquake protection of cultural heritage                                     | 2010 | Advanced Materials Research                                                                                  |
| Wang J., Li S.                                                                                                  | The rhetoric and reality of culture-led urban regeneration-a comparison of Beijing and Shanghai, China                                             | 2010 | Built Environment: Design, Management and Applications                                                       |
| Barone P.M., Di Matteo A., Graziano F., Mattei E., Pettinelli E.                                                | GPR application to the structural control of historical buildings: Two case studies in Rome, Italy                                                 | 2010 | Near Surface Geophysics                                                                                      |
| Torres I., Freitas V.P.d.                                                                                       | The influence of the thickness of the walls and their properties on the treatment of rising damp in historic buildings                             | 2010 | Construction and Building Materials                                                                          |
| Forster A.M.                                                                                                    | Building conservation philosophy for masonry repair: part 2 – “principles”                                                                         | 2010 | Structural Survey                                                                                            |
| Forster A.M.                                                                                                    | Building conservation philosophy for masonry repair: part 1 – “ethics”                                                                             | 2010 | Structural Survey                                                                                            |
| Worobiec A., Samek L., Krata A., Van Meel K., Krupinska B., Anna Stefaniak E., Karaszkievicz P., Van Grieken R. | Transport and deposition of airborne pollutants in exhibition areas located in historical buildings-study in Wawel Castle Museum in Cracow, Poland | 2010 | Journal of Cultural Heritage                                                                                 |
| Heylighen A., Rychtáriková M., Vermeir G.                                                                       | Designing spaces for every listener                                                                                                                | 2010 | Universal Access in the Information Society                                                                  |

| Authors                                                               | Title                                                                                                                                         | Year | Source                                                                                                                                                                          |
|-----------------------------------------------------------------------|-----------------------------------------------------------------------------------------------------------------------------------------------|------|---------------------------------------------------------------------------------------------------------------------------------------------------------------------------------|
| Finat J., Delgado F.J.,<br>Martínez R., Hurtado A.                    | GIRAPIM. A 3D information system for surveying<br>Cultural Heritage environments                                                              | 2010 | <i>International Archives of<br/>the Photogrammetry,<br/>Remote Sensing and<br/>Spatial Information<br/>Sciences - ISPRS<br/>Archives</i>                                       |
| Pulselli R.M., Niccolucci<br>V., Marchettini N.                       | A thermodynamics-based measurement of<br>environmental resource use in buildings and<br>cultural heritage                                     | 2009 | International Journal of<br>Design and Nature and<br>Ecodynamics                                                                                                                |
| Fadli F., Sibley M.                                                   | Hammāms of North Africa: An architectural<br>study of sustainability concepts in a historical<br>traditional building                         | 2009 | PLEA 2009 -<br>Architecture Energy<br>and the Occupant's<br>Perspective:<br>Proceedings of the 26th<br>International<br>Conference on Passive<br>and Low Energy<br>Architecture |
| Cheng W., Zhao T.-Y., Bie<br>D.                                       | Investigation and research on the security risks<br>of historic preservation districts                                                        | 2009 | Journal of Harbin<br>Institute of Technology<br>(New Series)                                                                                                                    |
| Bonazza A., Sabbioni C.,<br>Messina P., Guaraldi C.,<br>De Nuntiis P. | Climate change impact: Mapping thermal stress<br>on Carrara marble in Europe                                                                  | 2009 | Science of the Total<br>Environment                                                                                                                                             |
| Al-kheder S., Al-<br>shawabkeh Y., Haala N.                           | Developing a documentation system for desert<br>palaces in Jordan using 3D laser scanning and<br>digital photogrammetry                       | 2009 | Journal of<br>Archaeological Science                                                                                                                                            |
| Buhagiar V.M.                                                         | <i>Occupant satisfaction in post-refurbishment of<br/>historic buildings: Baroque case studies in Valletta,<br/>Malta</i>                     | 2009 | PLEA 2009 -<br>Architecture Energy and<br>the Occupant's<br>Perspective: Proceedings<br>of the 26th International<br>Conference on Passive<br>and Low Energy<br>Architecture    |
| Pessôa J., Caldeira M.                                                | The telephone on the eighteenth - century table:<br>How Brazilian modern architects conceived the<br>preservation of historic city centers    | 2009 | Future Anterior                                                                                                                                                                 |
| Ayón A.                                                               | Historic fabric vs. design intent: Authenticity<br>and preservation of Modern architecture at<br>Frank Lloyd Wright's Guggenheim Museum       | 2009 | Journal of<br>Architectural<br>Conservation                                                                                                                                     |
| Tucker L.M.                                                           | Do no harm                                                                                                                                    | 2009 | Lighting Design and<br>Application: LD and A                                                                                                                                    |
| Hees R.v., Naldini S.,<br>Lubelli B.                                  | The development of MDDS-COMPASS.<br>Compatibility of plasters with salt loaded<br>substrates                                                  | 2009 | Construction and<br>Building Materials                                                                                                                                          |
| Fischetti D.C.                                                        | Structural Investigation of Historic Buildings: A<br>Case Study Guide to Preservation Technology<br>for Buildings, Bridges, Towers, and Mills | 2009 | Structural<br>Investigation of<br>Historic Buildings: A<br>Case Study Guide to<br>Preservation                                                                                  |

| Authors                                                              | Title                                                                                                                          | Year | Source                                                                                                                                                                                            |
|----------------------------------------------------------------------|--------------------------------------------------------------------------------------------------------------------------------|------|---------------------------------------------------------------------------------------------------------------------------------------------------------------------------------------------------|
|                                                                      |                                                                                                                                |      | Technology for Buildings, Bridges, Towers, and Mills                                                                                                                                              |
| Shanks J., Walker P., Harris R.                                      | Development of rational guidelines for traditional joints in oak frame construction                                            | 2008 | 10th World Conference on Timber Engineering 2008                                                                                                                                                  |
| Mazzolani F.M.                                                       | Advanced techniques for seismic protection of historical buildings: Experimental and numerical approach                        | 2008 | AIP Conference Proceedings                                                                                                                                                                        |
| Bucur-Horváth I., Popa I., Bulbuk M., Virág J.                       | <i>Historical constructions - Authenticity and adaptation to the modern demands</i>                                            | 2008 | <i>Structural Analysis of Historic Construction: Preserving Safety and Significance - Proceedings of the 6th International Conference on Structural Analysis of Historic Construction, SAHC08</i> |
| Valluzzi M.R.                                                        | Strengthening of masonry structures with Fibre Reinforced Plastics: From modern conception to historical building preservation | 2008 | Structural Analysis of Historic Construction: Preserving Safety and Significance - Proceedings of the 6th International Conference on Structural Analysis of Historic Construction, SAHC08        |
| Pittas M.                                                            | Restoration of a historical building for Cyprus Technical Chamber                                                              | 2008 | Structural Analysis of Historic Construction: Preserving Safety and Significance - Proceedings of the 6th International Conference on Structural Analysis of Historic Construction, SAHC08        |
| Brignola A., Del Podestà A., Grosso S., Resemini S., Riotto G.       | Diagnostic tests and numerical simulations for the preservation of two stone stairways in the historic centre of Genoa (Italy) | 2008 | Structural Analysis of Historic Construction: Preserving Safety and Significance - Proceedings of the 6th International Conference on Structural Analysis of Historic Construction, SAHC08        |
| Rosina E., Ludwig N., Torre S.D., D'Ascola S., Sotgia C., Cornale P. | Thermal and hygroscopic characteristics of restored plasters with different surface textures                                   | 2008 | Materials Evaluation                                                                                                                                                                              |
| Sorrentino L., Kunnath S., Monti G., Scalora G.                      | Seismically induced one-sided rocking response of unreinforced masonry façades                                                 | 2008 | Engineering Structures                                                                                                                                                                            |

| Authors                                                                                  | Title                                                                                                                                | Year | Source                                                                                                                 |
|------------------------------------------------------------------------------------------|--------------------------------------------------------------------------------------------------------------------------------------|------|------------------------------------------------------------------------------------------------------------------------|
| Necevska-Cvetanovska G., Apostolska R.                                                   | Consolidation, rebuilding and strengthening of St. Clement's Church, St. Panteleymon, Plaoshnik, Ohrid                               | 2008 | Engineering Structures                                                                                                 |
| Paret T.F., Freeman S.A., Searer G.R., Hachem M., Gilmartin U.M.                         | Using traditional and innovative approaches in the seismic evaluation and strengthening of a historic unreinforced masonry synagogue | 2008 | Engineering Structures                                                                                                 |
| Barone G., Campani E., Casoli A., La Russa M.F., Lo Giudice A., Mazzoleni P., Pezzino A. | The Cathedral of St. Giorgio in Ragusa Ibla (Italy): A case study of the use of protective products                                  | 2008 | Environmental Geology                                                                                                  |
| Papadopoulos A.M., Avgelis A., Anastaselos D.                                            | Low energy cooling of the White Tower, functioning as a contemporary museum                                                          | 2008 | Energy and Buildings                                                                                                   |
| Garavaglia E., Anzani A., Binda L., Cardani G.                                           | Fragility curve probabilistic model applied to durability and long term mechanical damage of masonry                                 | 2008 | Materials and Structures/Materiaux et Constructions                                                                    |
| Calderini C.                                                                             | Use of reinforced concrete in preservation of historic buildings: Conceptions and misconceptions in the early 20th century           | 2008 | International Journal of Architectural Heritage                                                                        |
| Lazarus D.                                                                               | Maintenance of heritage architecture: Implementation and practice                                                                    | 2007 | WIT Transactions on the Built Environment                                                                              |
| Amoêda R., Pinheiro C.                                                                   | Building deconstruction and building heritage preservation: A case study at Porto's world heritage historical centre                 | 2007 | Portugal SB 2007 - Sustainable Construction, Materials and Practices: Challenge of the Industry for the New Millennium |
| Sorace S., Terenzi G.                                                                    | Rebuilding of an ancient castle including a base-isolated museum hall                                                                | 2007 | WIT Transactions on the Built Environment                                                                              |
| Vargas A.P., Schierle G.G.                                                               | The textile block system: Seismic analysis and upgrading                                                                             | 2007 | WIT Transactions on the Built Environment                                                                              |
| Dagostino S., Bellomo M.                                                                 | Seismic risk and conservation of architectural heritage in the Mediterranean basin                                                   | 2007 | WIT Transactions on the Built Environment                                                                              |
| Casarin F., Valluzzi M.R., Da Porto F., Modena C.                                        | Evaluation of the structural behaviour of historic masonry buildings by using a sonic pulse velocity method                          | 2007 | WIT Transactions on the Built Environment                                                                              |
| Wonmg C.-T., Chan P.-E.                                                                  | Refurbishment of Kom Tong Hall as Dr Sun Yat-sen Museum                                                                              | 2007 | Structural Engineer                                                                                                    |
| Tavukcuoglu A., Duzgunes A., Demirci S., Caner-Saltik E.N.                               | The assessment of a roof drainage system for an historical building                                                                  | 2007 | Building and Environment                                                                                               |
| Mazzolani F.M.                                                                           | Earthquake protection of historical buildings by reversible mixed technologies                                                       | 2006 | Proceedings of the 5th International Conference on Behaviour of Steel Structures in Seismic Areas - Stessa 2006        |
| Rajkovich N., Thomson G.                                                                 | Unbuilt, untested, performance unknown: Libbey-owens-ford and "your solar house"                                                     | 2006 | International Solar Energy Conference                                                                                  |

| Authors                                                            | Title                                                                                                                          | Year | Source                                                                    |
|--------------------------------------------------------------------|--------------------------------------------------------------------------------------------------------------------------------|------|---------------------------------------------------------------------------|
| Andrew A., Pitt M.                                                 | Changes in asset valuation in the UK health service                                                                            | 2006 | Facilities                                                                |
| Mattone M.                                                         | The state of preservation of wooden structures: Resistographic and X-ray tests                                                 | 2006 | 9th World Conference on Timber Engineering 2006, WCTE 2006                |
| De Boer S.                                                         | Diffusion or diversity in cultural heritage preservation? comparing policy arrangements in Norway, Arizona and the Netherlands | 2006 | Institutional Dynamics in Environmental Governance                        |
| Raghunathan A., Sinha A.                                           | Rockfort temple at Tiruchirapalli, India: Conservation of a sacred landscape                                                   | 2006 | International Journal of Heritage Studies                                 |
| Dann N., Worthing D.                                               | Heritage organisations and condition surveys                                                                                   | 2005 | Structural Survey                                                         |
| Adachi A.Z., Slama J.G.                                            | Architectural acoustics and preservation, a feasible project for schools of music                                              | 2005 | International Congress on Noise Control Engineering 2005, INTERNOISE 2005 |
| El-Borgi S., Smaoui H., Casciati F., Jerbi K., Kanoun F.           | Seismic evaluation and innovative retrofit of a historical building in Tunisia                                                 | 2005 | Structural Control and Health Monitoring                                  |
| Kankpeyeng B.W., DeCorse C.R.                                      | Ghana's Vanishing past: Development, antiquities, and the destruction of the archaeological record                             | 2004 | African Archaeological Review                                             |
| Fong K.L., Louie C.                                                | Façade ordinances and historic structures - Theoretical and practical conservation issues in inspection and repair             | 2004 | ASTM Special Technical Publication                                        |
| Borchardt J.K.                                                     | Reinforced plastics help preserve historic buildings                                                                           | 2003 | Reinforced Plastics                                                       |
| Burland J.B., Jamiolkowski M., Viggiani C.                         | The stabilisation of the leaning Tower of Pisa                                                                                 | 2003 | Soils and Foundations                                                     |
| De Buergo M.A., González R.F.                                      | Protective patinas applied on stony façades of historical buildings in the past                                                | 2003 | Construction and Building Materials                                       |
| Kohler N., Hassler U.                                              | The building stock as a research object                                                                                        | 2002 | Building Research and Information                                         |
| Hebbelinck S., Hendrickx A.H., Mollaert M., Haase J.               | New ideas on the use of systematically constructed tension structures to cover historical and archaeological sites             | 2001 | Advances in Architecture Series                                           |
| Hebbelinck S., Hendrickx A.H., Mollaert M., Haase J.               | New ideas on the use of systematically constructed tension structures to cover historical and archaeological sites             | 2001 | WIT Transactions on the Built Environment                                 |
| Moropoulou A., Avdelidis N.P., Kouli M., Delegou E.T., Tsiourva T. | Infrared thermographic assessment of materials & techniques for the protection of cultural heritage                            | 2001 | Proceedings of SPIE - The International Society for Optical Engineering   |
| Caterina G., Castagneto F., De Joanna P., Fiore V., Scarcia L.     | Informatic tools for historical centres maintenance                                                                            | 2001 | WIT Transactions on the Built Environment                                 |

| Authors     | Title                                                                                                                    | Year | Source                                  |
|-------------|--------------------------------------------------------------------------------------------------------------------------|------|-----------------------------------------|
| Hughes J.   | Ten myths about the preservation of historic sites in Antarctica and some implications for Mawson's huts at Cape Denison | 2000 | Polar Record                            |
| Sharland J. | Listed buildings - The need for a new approach                                                                           | 2000 | Journal of Planning and Environment Law |
